# Supplementary material for: PI3K/Akt1 signalling specifies foregut precursors by generating regionalized extra-cellular matrix
Source: PubMed Central journal article supplement (PMC3871052; doi:10.7554/elife.00806), 2013-12-24
Supplement: elife00806s004.pdf [file elife00806s004.pdf]

**A**

|            | PD03 | SP600125 | SB239063 | LY249002* |
|------------|------|----------|----------|-----------|
| High (H)   | 3 mM | 10 mM    | 100 mM   | 40 mM     |
| Medium (M) | -    | 5 mM     | 50 mM    | 20 mM     |
| Low (L)    | 1 mM | 1 mM     | 10 mM    | 10 mM     |

\*Doses of LY used in this work are: Low from d3.5 to d4.5, and Medium from d4.5 onwards

**B**

| Cell Survival | PD03 |    |    | SP600125 |   |   | SB239063 |     |    | LY249002 |    |    |
|---------------|------|----|----|----------|---|---|----------|-----|----|----------|----|----|
|               | H    | M  | L  | H        | M | L | H        | M   | L  | H        | M  | L  |
| Phase1        | ++   | ND | ++ | -        | - | - | +++      | +++ | ++ | -        | -  | -  |
| Phase 2       | ++   | ND | ++ | -        | - | + | +++      | +++ | ++ | +        | ++ | ++ |

-, no cell survival

+, cell death significantly increased

++ , cell death similar to control cultures

+++ , cell death significantly reduced

ND, no data

### Supplementary file 1.

#### Inhibitor doses and cell survival

(A) Experimental dose of the inhibitors used during phases 1 and 2 of differentiation and, (B) Cell survival in response to inhibitor treatment during ESC differentiation.
